# Supplementary material for: Psychiatric, Motor, and Autonomic Effects of Bifrontal ECT in Depressed Parkinson’s Disease Patients
Source: Atypon-hosted journal article supplement (doi:10.1176/appi.neuropsych.20050133), 2021-02-25

**Table S1**

**TABLE 1. LEDs for antiparkinsonian drugs**

| Drug class                                  | Drug                                              | Number of studies reporting conversion formulae | Total LED (mg/100 mg L-dopa) |
|---------------------------------------------|---------------------------------------------------|-------------------------------------------------|------------------------------|
| L-Dopa                                      | L-Dopa                                            | –                                               | 100                          |
|                                             | Controlled release L-dopa                         | 29                                              | 133                          |
|                                             | Duodopa                                           | 0                                               | 90                           |
| COMT inhibitors                             | Entacapone                                        | 8                                               | LD × 0.33                    |
|                                             | Tolcapone                                         | 2                                               | LD × 0.5                     |
| Nonergot-derived dopamine receptor agonists | Pramipexole                                       | 24                                              | 1 mg salt                    |
|                                             | Ropinirole                                        | 34                                              | 5                            |
|                                             | Rotigotine                                        | 1                                               | 3.3                          |
|                                             | Piribedil                                         | 7                                               | 100                          |
| Ergot-derived dopamine receptor agonists    | Lisuride                                          | 9                                               | 1                            |
|                                             | Bromocriptine                                     | 30                                              | 10                           |
|                                             | Pergolide                                         | 28                                              | 1                            |
|                                             | Cabergoline                                       | 14                                              | 1.5                          |
|                                             | DHEC                                              | 6                                               | 20                           |
| MAOB inhibitors                             | Selegiline 10 mg (oral)                           | 2                                               | 10                           |
|                                             | Selegiline 1.25 mg (sublingual)                   | 0                                               | 1.25                         |
|                                             | Rasagiline                                        | 0                                               | 1                            |
| Other                                       | Amantadine                                        | 1                                               | 100                          |
|                                             | Apomorphine (infusion or intermittent injections) | 14                                              | 10                           |

To calculate the total LED for COMT inhibitors, the total L-dopa (including CR L-dopa if COMT inhibitor given simultaneously) amount should be calculated then multiplied by the appropriate value. For Stalevo, the L-dopa and COMT inhibitor should be split and calculated separately. The British National Formulary states that selegiline 10 mg oral is equivalent 1.25 mg sublingual.

COMT, catechol-*O*-methyl transferase; DHEC, dihydroergocryptine; MAOB, monoamine oxidase type B.

SUPPLEMENTAL TABLE 1. Summary of levodopa equivalent dose calculation method used.

Adapted from Shulman LM et al. *Arch Neurol* (2010).

L-Dopa (levodopa) is used as the frame of reference, i.e. 100mg levodopa is equal to 100mg LED.

LED = levodopa equivalent dose.

LD = levodopa.

**Figure S1**

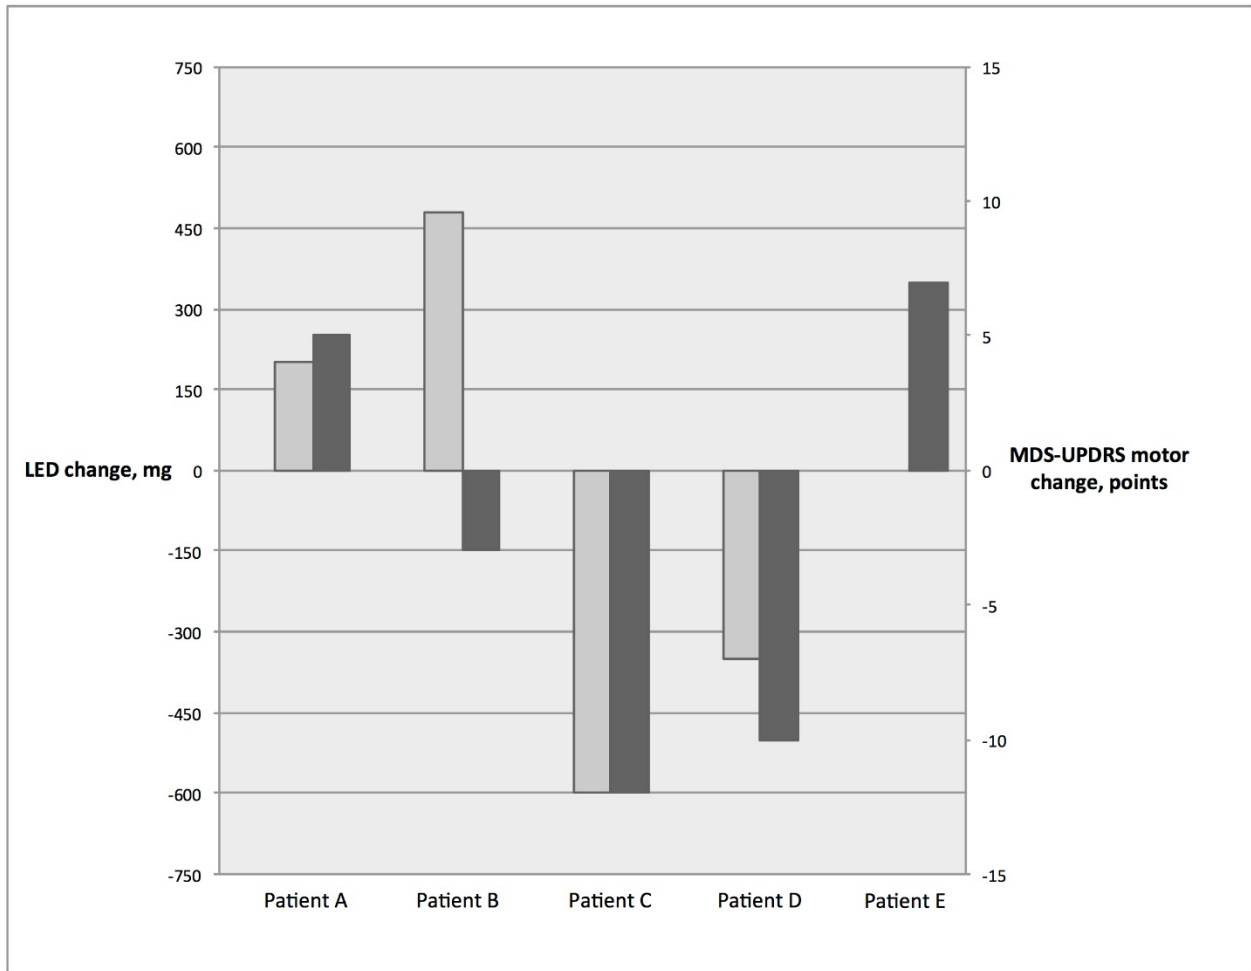

Supplement: appi.neuropsych.20050133.ds001.pdf [file appi.neuropsych.20050133.ds001.pdf]
